1 **Title:** Intralocus sexual conflict can maintain alternative reproductive tactics

2 **Running Title:** Sexual conflict maintains ARTs

3

4 **Authors:** Madilyn M. Gamble<sup>1</sup> and Ryan G. Calsbeek<sup>2</sup>

5 <sup>1</sup>Ecology, Evolution, Ecosystems, and Society Program, Dartmouth College, 78 College Street,

6 Hanover, NH 03755, USA. Email: [mmg.gr@dartmouth.edu](mailto:mmg.gr@dartmouth.edu). **ORCID ID:** [https://orcid.org/0000-](https://orcid.org/0000-0003-4791-059X)

7 [0003-4791-059X](https://orcid.org/0003-4791-059X)

8 <sup>2</sup>Ecology, Evolution, Ecosystems, and Society Program, Dartmouth College, 78 College Street,

9 Hanover, NH 03755, USA. Email: [ryan.g.calsbeek@dartmouth.edu](mailto:ryan.g.calsbeek@dartmouth.edu). **ORCID ID:**

10 <https://orcid.org/0000-0002-9236-4092>

11

12 **Keywords:** intralocus conflict, alternative reproductive tactics, selection, heritability

13

14 **Abstract**

15 Alternative reproductive tactics (ARTs) are ubiquitous throughout the animal kingdom and  
16 widely regarded as an outcome of high variance in reproductive success. Proximate mechanisms  
17 underlying ARTs include genetically based polymorphisms, environmentally induced  
18 polymorphisms, and those mediated by a combination of genetic and environmental factors.  
19 However, few ultimate mechanisms have been proposed to explain the maintenance of ARTs  
20 over time, the most important of which have been disruptive and negative frequency-dependent  
21 selection. Here we explore the role that intralocus sexual conflict may play in the maintenance of  
22 sex-specific ARTs. We use a genetically explicit individual-based model in which body size  
23 influences both female fecundity and male tactic through a shared genetic architecture. By

## Sexual conflict maintains ARTs

24 modeling ART maintenance under varying selection regimes and levels of sex-specific gene  
25 expression, we explore the conditions under which intralocus sexual conflict can maintain a  
26 hypothetical ART defined by larger (alpha) and smaller (beta) tactics. Our models consistently  
27 revealed that sexual conflict can result in the persistence of a sex-specific polymorphism over  
28 hundreds of generations, even in the absence of negative frequency-dependent selection. ARTs  
29 were maintained through correlated selection when one male ART has lower fitness but produces  
30 daughters with higher fitness. These results highlight the importance of understanding selection  
31 on both sexes when attempting to explain the maintenance of ARTs. Our results are consistent  
32 with a growing literature documenting genetic correlations between male ARTs and female  
33 fitness, suggesting that the maintenance of sex-specific ARTs through intralocus sexual conflict  
34 may be common and widespread in nature.

## Sexual conflict maintains ARTs

### 35 **Introduction**

36       Alternative reproductive tactics (ARTs) are ubiquitous throughout the animal kingdom and  
37 are widely regarded as an outcome of high variance in reproductive success (Shuster and Wade  
38 2003). Proximate mechanisms underlying ARTs include purely genetically based polymorphisms  
39 (Shuster 1989; Cordero 1990; Lank et al. 1995; Sinervo and Lively 1996; Sinervo et al. 2000b),  
40 purely environmentally induced polymorphisms (Thornhill 1981; Emlen 1994; Hunt and  
41 Simmons 1997; Moczek and Emlen 1999), as well as those mediated by a combination of genetic  
42 and environmental factors (Neff and Svensson 2013). However, few ultimate mechanisms have  
43 been proposed to explain the evolutionary maintenance of ARTs over time. The most prominent  
44 of these mechanisms are disruptive and negative frequency-dependent forms of selection  
45 (Oliviera et al. 2008; Hughes et al. 2013), both of which have been documented in theoretical,  
46 laboratory, and field studies (Gross 1985, 1991, 1996; Oliviera et al. 2008). These forms of  
47 selection are particularly important in the maintenance of polymorphism because negative  
48 frequency dependence and disruptive selection are themselves variable forms of selection, the  
49 former varying over space and time, the latter varying over the statistical distribution of  
50 phenotypes.

51       Variable selection can also occur within a population when a trait that is expressed in both  
52 males and females has alternative sex-specific fitness optima, resulting in sexually antagonistic  
53 selection on that trait (Lande 1980). If that trait also has a common genetic basis in males and  
54 females, then sexually antagonistic selection will lead to intralocus sexual conflict  
55 (Bonduriansky and Chenoweth 2009). While others have proposed that intralocus sexual conflict  
56 may maintain additive genetic variance (Rice and Chippindale 2001; Foerster et al. 2007) and  
57 genetic polymorphism (Connallon and Clark 2012), result in balancing selection (Connallon and

## Sexual conflict maintains ARTs

58 Clark 2014), and promote speciation (Bonduriansky 2011), the potential for intralocus sexual  
59 conflict to maintain alternative reproductive tactics is comparatively understudied. There is  
60 nevertheless reason to think that intralocus sexual conflict could be a potent force that maintains  
61 variation in nature. Indeed, a growing body of evidence shows that selection on male ARTs and  
62 the traits that differentiate them results in correlated evolution in females: genetic linkage  
63 between male ARTs and female reproductive traits has been described in lizards (Sinervo and  
64 Zamudio 2001), crickets (Heinen-Kay et al. 2020a; Richardson et al. 2021), and bulb mites  
65 (Bielak et al. 2014; Buzatto et al. 2018; Buzatto and Clark 2020; Łukasiewicz et al. 2020).

66 While analytical models describe the action of selection on quantitative traits (Otto and Day  
67 2007), correlated traits (Lande and Arnold 1983), and threshold traits including ARTs (Gross and  
68 Repka 1998), we are unaware of any theory that simultaneously investigates evolution under  
69 both sexually antagonistic selection on continuous quantitative traits and variable intersexual  
70 genetic correlations. Here we take new steps towards understanding the role that intralocus  
71 sexual conflict may play in the maintenance of sex-specific ARTs. We use a genetically explicit  
72 individual-based model in which body size influences both female fecundity and male tactic  
73 through a shared genetic architecture. By modeling ART maintenance under varying selection  
74 regimes and levels of sex-specific gene expression, we explore the conditions under which  
75 intralocus sexual conflict can maintain a hypothetical ART defined by larger ( $\alpha$ ) and smaller  
76 ( $\beta$ ) tactics.

77 To evaluate the potential for sexually antagonistic selection and intralocus sexual conflict to  
78 maintain ARTs, we allowed a theoretical population to evolve under a range of scenarios  
79 representing three different selection regimes acting on males: no selection, directional selection  
80 against  $\alpha$  males, and negative frequency-dependent selection. Within each selection regime

## Sexual conflict maintains ARTs

81 we also varied the degree to which males and females could evolve independently by varying the  
82 number of genetic loci with sex-dependent expression. We used these models to test our  
83 hypothesis that intralocus sexual conflict may influence ART frequency over time, and that this  
84 process might be altered by different selection regimes and/or the breakdown of intersexual  
85 genetic correlations through sex-specific gene expression. Specifically, we predicted ARTs could  
86 be maintained: (1) when alpha and beta males have equal probabilities of survival and mating but  
87 intersexual heritability is low such that larger females do not necessarily produce larger (alpha)  
88 sons, and (2) when alpha males are selected against but intersexual heritability of body size is  
89 high such that low-fitness alpha males produce high-fitness daughters. While it is often assumed  
90 that a male tactic that is larger, more sexually dimorphic, or that has sexually selected weapons  
91 should have higher fitness, this need not necessarily be the case. Sexually-selected weapons  
92 developed in fighter males are often costly to produce, requiring higher energy investment and  
93 delayed development, both of which may contribute to higher mortality risk (Hunt and Simmons  
94 1997). Fighter males often have higher testosterone levels than other male tactics, which can lead  
95 to decreased survival (Sinervo et al. 2000a). In other cases, smaller males may have higher  
96 fitness if shorter times to reach sexual maturity reduce their probability of mortality prior to  
97 reproduction (Gross 1996).

98

## 99 **Methods**

### 100 Overview

101 In modeling the frequency of two different male ARTs – a larger “alpha” and smaller “beta”  
102 male – we assumed that ART was a quantitative threshold trait determined by body size, which  
103 in turn was entirely genetically controlled by 20 quantitative loci. Individual males with a body

## Sexual conflict maintains ARTs

104 size greater than or equal to a threshold value became alpha males, and those below the threshold  
105 became beta males. Females, which did not express these ARTs, had a fecundity value  
106 proportional to their body size. For simplicity we assumed a discrete population of semelparous  
107 individuals with non-overlapping generations. We did not include linkage disequilibrium or  
108 mutations in our model; all genetic variance stemmed from an initial random draw of allele  
109 values in the first generation.

110 To test our hypothesis that intralocus sexual conflict can affect the maintenance of ARTs, we  
111 varied both the form of selection acting on the male ARTs and the intersexual heritability for  
112 body size. We varied the form of selection on males by changing the relative fitness of each  
113 tactic. We exposed the population to a null selection regime in which both male ARTs were  
114 equally likely to survive and mate. We simulated sexually antagonistic selection by assigning  
115 lower fitness to alpha males but higher fitness (fecundity) to larger females. Finally, we explored  
116 the role of negative frequency-dependent selection in which the rare male ART in each  
117 generation had a fitness advantage.

118 We altered the intersexual heritability of body size by varying the number of body size loci  
119 that were “general” or “sex-specific” in their expression. When all 20 loci were “general,” the  
120 effect of each allele controlling body size was the same in both sexes. This made size equally  
121 heritable within and between the sexes, so larger (alpha) males produced larger (more fecund)  
122 daughters than beta males. We predicted that correlated selection acting on males because of  
123 fecundity selection might allow alpha males to persist in the population, even when directional  
124 selection acts against them. However, as more loci become “sex-specific” – that is, allelic  
125 expression depended on sex and genetic architecture for size was less shared between the sexes –  
126 intersexual heritability should decline, and sire tactic should no longer influences daughter

## Sexual conflict maintains ARTs

127 fitness. Thus, alpha males should no longer produce fitter daughters, and we predicted that  
128 consistent directional selection against alpha males could result in their decline or disappearance  
129 from the population.

130

### 131 The Model

132 We initiated each simulation with a parent generation comprised of 1000 diploid sexually  
133 reproducing individuals (50:50 sex ratio). Each individual in our model had two traits that made  
134 up its phenotype: sex and size. Sex was assigned randomly, and size was a quantitative trait  
135 determined by the sum of allele values measured across 20 loci. To allow for sex-specific allelic  
136 effects, each allele had two possible values ( $f$  and  $m$ ) that influence body size. That is, each locus  
137 had a total of three possible values that contribute to body size, and which value was expressed  
138 depends on whether the locus was sex-specific or general and if the former, whether the  
139 individual was male or female. For each sex-specific locus, only the two allele values  
140 corresponding to that individual's assigned sex contributed to the body size value. This is the  
141 biological equivalent of an allele that has sex-specific expression (Rice and Chippindale 2001).  
142 For general loci the value of each allele at that locus was determined by averaging the allele's  
143 two possible values. Allele values for the parent generation were drawn randomly from a normal  
144 distribution with mean = 0 and SD = 0.5. We calculated the size of the individual from the  
145 genotype using the following sex-specific equations:

$$146 \quad \text{Female Size} = \sum_{i=1}^{20-n} \frac{(f_{iD} + m_{iD})}{2} + \frac{(f_{iS} + m_{iS})}{2} + \sum_{i=20-n}^{20} f_{iD} + f_{iS} + C$$

$$147 \quad \text{Male Size} = \sum_{i=1}^{20-n} \frac{(f_{iD} + m_{iD})}{2} + \frac{(f_{iS} + m_{iS})}{2} + \sum_{i=20-n}^{20} m_{iD} + m_{iS} + C$$

## Sexual conflict maintains ARTs

148 where  $n$  was the number of sex-specific loci,  $f$  and  $m$  are the female- and male-specific values,  
149 respectively, of the two alleles at the  $i$ th locus inherited from the dam ( $D$  subscript) or the sire ( $S$   
150 subscript), and  $C$  is a constant. The first summation calculated the component of the phenotypic  
151 value contributed from the general loci; the second summation calculated the contribution of the  
152 sex-specific loci. Adding a constant to the expression ensured that size remained a positive  
153 number with a mean of  $C$  in the parent generation; any individual whose calculated size was less  
154 than zero was assigned a size of zero. We arbitrarily set  $C = 10$  for our simulations.

155 Male mating tactic was determined by threshold body size: males with size greater than or  
156 equal to 10 were alpha males and those with size less than 10 were beta males. Fecundity was  
157 assigned to females as a function of size:

$$158 \quad \text{Fecundity} = \frac{12 \times \text{size}^2}{\text{size}^2 + 100}$$

159 such that fecundity increased asymptotically with increasing body size to a maximum value  
160 approaching 12 offspring at a size of 40. This set an upper limit on fecundity selection while  
161 preserving positive directional selection on female size.

162 We modeled the evolution of male and female body size and ART frequency under seven  
163 different selection regimes on male body size and five different values for the number of sex-  
164 specific loci for a total of 35 different model scenarios (Table 1). These varied in the degree to  
165 which selection on size was sexually antagonistic and in the intersexual heritability of size, thus  
166 creating a spectrum of intralocus sexual conflict. We varied direct selection on males by  
167 changing the relative combined probability of survival and mating (hereafter  $W_T$  for each tactic).  
168 In the “no selection” model individuals of both ARTs had equal values of  $W$ . In three separate  
169 “directional selection” models we set  $W_a = 1$  and  $W_b = 1.5, 1.8, \text{ or } 2$ . This allowed us to evaluate  
170 how the strength of direct selection on male tactic affected ART maintenance in the face of



## Sexual conflict maintains ARTs

171 intralocus sexual conflict. In each directional selection model,  $W_a$  and  $W_b$  were held constant  
172 across generations. In three separate “negative frequency-dependent selection” models, each  
173 tactic’s  $W$  varied as function of its frequency ( $F_T$ ) such that the rare tactic in each generation  
174 always had a higher mating probability ( $1 - F_T$ ). We ran three different negative frequency-  
175 dependent models which ranged in starting frequency ratios of alpha and beta males from  $F_a:F_b$   
176 = 2:1, 1:1, and 1:2. This allowed us to evaluate how initial tactic frequencies affected ART  
177 maintenance under negative frequency-dependent selection.

178

179 **Table 1.** Parameters and values modeled, resulting in 35 total scenarios modeled. Each scenario  
180 varied in the form of selection on males and the number of sex-specific loci. Negative frequency  
181 dependent models also varied in the starting frequency ratio of alpha to beta males ( $F_a:F_b$ );  
182 directional selection models also varied in the ratio of alpha fitness to beta fitness ( $W_a:W_b$ ).

| Parameter           | Values modeled                                          |
|---------------------|---------------------------------------------------------|
| Selection Regime    | No Selection, $W_a = W_b$                               |
|                     | Negative frequency dependent selection, $F_a:F_b = 1:1$ |
|                     | Negative frequency dependent selection, $F_a:F_b = 1:2$ |
|                     | Negative frequency dependent selection, $F_a:F_b = 2:1$ |
|                     | Directional selection against alphas, $W_a:W_b = 1:1.5$ |
|                     | Directional selection against alphas $W_a:W_b = 1:1.8$  |
|                     | Directional selection against alphas $W_a:W_b = 1:2$    |
| # Sex-Specific Loci | 0, 5, 10, 15, 20                                        |

183

## Sexual conflict maintains ARTs

184 In all models,  $W_f$  did not differ among individual females, but the proportion of females that  
185 survived to mate in each generation declined with population size to simulate density-dependent  
186 population growth regulation. The proportion of females surviving to mate ( $M_f$ ) was calculated  
187 anew for each generation using the equation:

$$188 \quad M_f = \frac{0.5}{1 + e^{-2+KN}}$$

189 where  $K$  is a constant and  $N$  is the current population size. We chose  $K = 0.0015$  such that this  
190 equation defined a sigmoidal curve that decreased from 0.44 at  $N = 0$  to 0.04 at  $N = 3000$ . For  
191 each generation the number of females that were allowed to reproduce ( $D$ ) was calculated as:

$$192 \quad D = M_f N$$

193  $D$  females were randomly chosen to be dams.  $D$  males were similarly chosen to be sires but  
194 sire selection was weighted by  $W_T$ . Dams were randomly paired with sires (no assortative  
195 mating), and a number of offspring equivalent to the dam's fecundity were created. Each  
196 offspring inherited alleles at all 20 loci in a Mendelian fashion such that at each locus the  
197 offspring inherits one allele from the dam and one from the sire, and the allele inherited from  
198 each parent is randomly drawn from the two alleles each parent possesses. Sex was assigned  
199 randomly to offspring to achieve an approximately equal sex ratio, and size, fecundity, and  
200 mating probability were calculated for each offspring as described above for individuals in the  
201 parent generation. These offspring were then used as parents for the next generation, and the  
202 model was iterated for a total of 500 generations in each model scenario. We ran 11 replicates of  
203 the full set of the 35 model scenarios to ensure that results did not qualitatively differ among  
204 model runs.

205

206 Analysis

## Sexual conflict maintains ARTs

207 In each of the 35 model scenarios, for each generation we calculated (1) intra- and  
208 intersexual heritability of size (to understand the degree to which males and females could  
209 respond independently to selection), (2) the sex-specific mean and variance of size (to  
210 understand the degree of sexual dimorphism that evolved and the opportunity for selection), (3)  
211 sex-specific selection gradients for size (to understand the degree to which selection was  
212 sexually antagonistic), and (4) the frequency of ARTs (to understand how intralocus sexual  
213 conflict affects ART maintenance). Intra- and intersexual heritabilities were calculated by  
214 doubling the regression coefficient of the sex-specific mean offspring size regressed on sex-  
215 specific parent size (Falconer and Mackay 1960). Sex-specific selection gradients for each  
216 generation were calculated as the slope of the regression of relative fitness on standardized body  
217 size. Relative fitness for each sex was calculated by dividing the number of offspring produced  
218 by each individual by the mean number of offspring produced by that sex; standardized body  
219 size was calculated by scaling each individual's body size to the sex-specific mean and dividing  
220 by the sex-specific standard deviation. We then recorded how each of these factors changed  
221 across generations (i.e., as additive genetic and phenotypic variance change), and how that  
222 change varied with (1) the selection regime and (2) the number of loci that were sex-specific  
223 rather than general in their effect on body size. Finally, given that intralocus sexual conflict is  
224 known to affect intrinsic population growth rates, we also plotted population size over 500  
225 generations for each selection regime and calculated geometric mean population growth rates  
226 (Lewontin and Cohen 1969) for each selection regime and number of sex-specific loci. Using  
227 data from all 11 replicates of each of the 35 model scenarios, we used linear models to determine  
228 whether geometric mean population growth rates differed with the number of sex-specific loci in  
229 each selection regime.

## Sexual conflict maintains ARTs

230

### 231 Results

232 Results were not qualitatively different among the 11 replicate sets of model runs. Therefore,  
233 for all analyses except population growth rates, we report results from a single set of 35 model  
234 runs.

235 Increasing the number of sex-specific loci decreased intersexual heritability. Intrasexual  
236 heritability was approximately 1 and was constant across selection regimes, numbers of sex-  
237 specific loci, and generations. Intersexual heritability generally decreased from 1 to 0 as the  
238 number of sex-specific loci increased from 0 to 20 (Figure 1). This trend was consistent across  
239 all selection regimes.

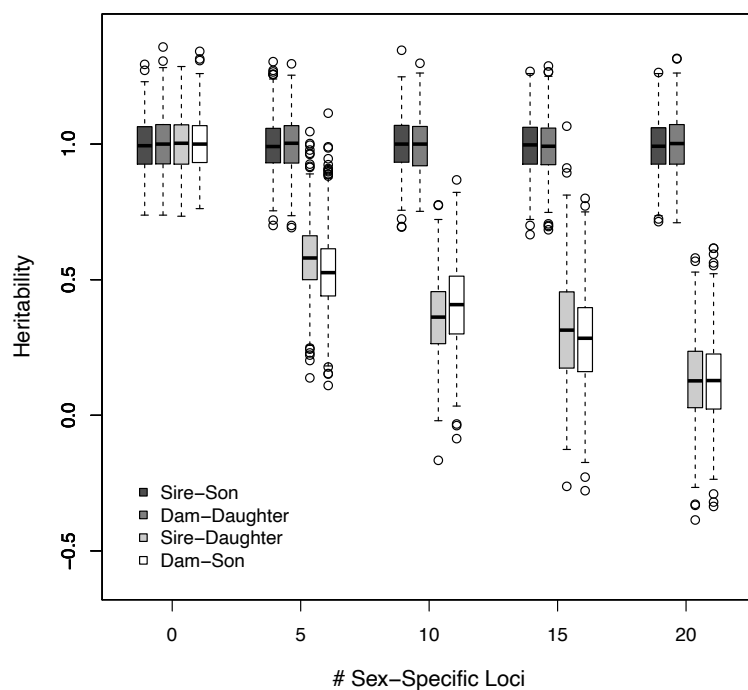

**Figure 1.** Box plots show mean values of inter- and intrasexual heritability averaged across 500 generations in a “no selection” simulation. Intersexual heritability declined as the number of sex-specific loci increased. Intrasexual heritability for body size did not vary with the number of sex-specific loci. Results were qualitatively similar across all other selection regimes.

240

## Sexual conflict maintains ARTs

241       Increasing the number of sex-specific loci also facilitated the evolution of sexual size  
242       dimorphism. Sexual dimorphism evolved in all selection regimes when intersexual heritability  
243       was less than 1 ( $>0$  sex-specific loci; Figure 2). The rate and degree to which the sexes diverged  
244       in body size depended on the selection regime and the number of sex-specific loci (i.e., the  
245       intersexual heritability). In all cases, sexual dimorphism evolved faster and to a greater degree  
246       when intersexual heritability was low (fewer sex-specific loci) and when selection was sexually  
247       antagonistic (males experienced directional selection favoring betas). This result is consistent  
248       with existing literature and theory on the evolution of sexual dimorphism (Cox and Calsbeek  
249       2009).

## Sexual conflict maintains ARTs

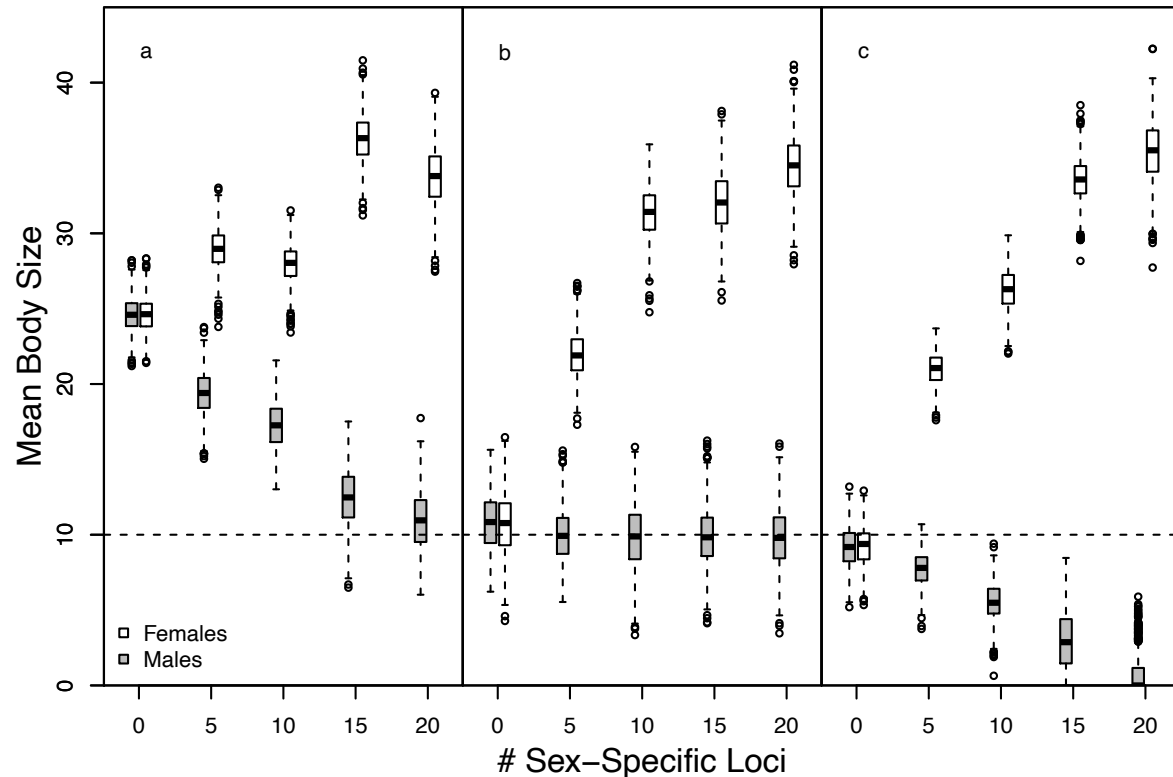

**Figure 2.** Boxplots showing the final mean body size of females and males across a range of the number of sex-specific loci and three different selection regimes in (a) a no selection regime, (b) a negative frequency-dependent selection regime in which initial tactic frequencies were equal, and (c) a directional selection regime in which beta males were 1.8 x more likely to survive and mate than alpha males. Dotted horizontal line represents the size threshold separating alpha and beta males, therefore male boxplots overlapping this line indicate that both tactics persisted over 500 generations in that scenario. Results from negative frequency-dependent selection regimes with different initial frequencies and from directional selection regimes with different mating probability ratios are qualitatively the same as (b) and (c), respectively, and are not shown here.

250

251 Sex-specific selection gradients reflected the imposed selection regimes initially in all  
252 selection regimes (Figure 3). In subsequent generations, selection gradients for both males and  
253 females converged on zero in most models, as the population responded to selection and body  
254 size evolved. Smaller selection gradients in later generations reflected a reduction in the variance  
255 in male body size (as body size responds to selection), a reduction in the covariance between  
256 female body size and fecundity (as females reach a size at which the fecundity-body size  
257 relationship asymptotes), or both. Differences in sex-specific selection gradients were maintained  
258 in the directional and negative frequency-dependent selection regimes in which intersexual

## Sexual conflict maintains ARTs

259 heritability was high (zero sex-specific loci) and ARTs were maintained.

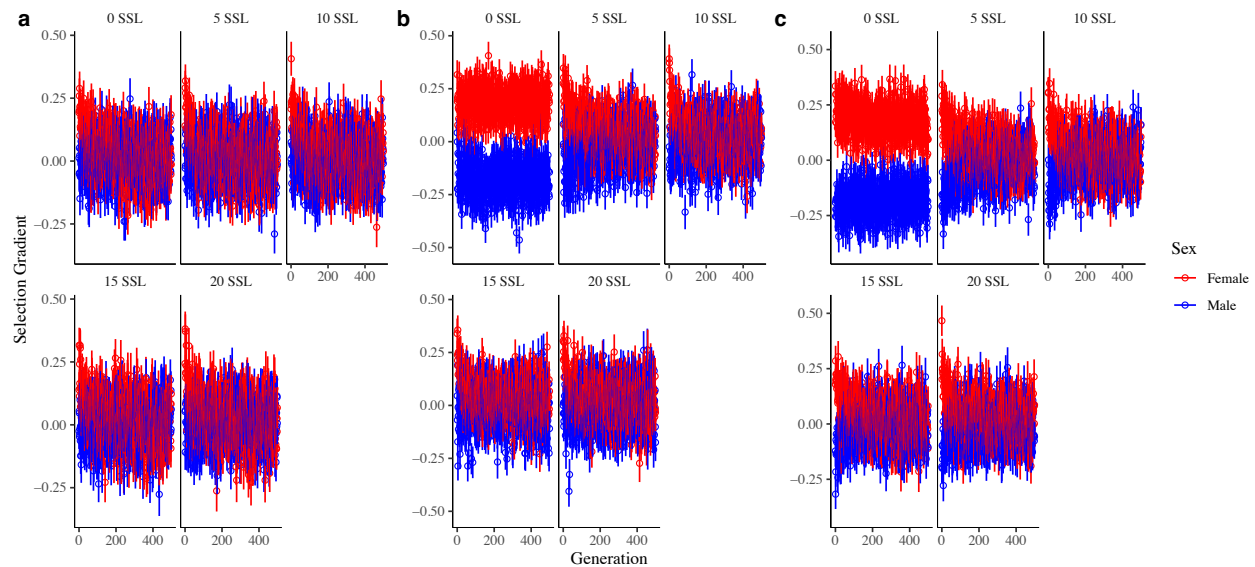

**Figure 3.** Selection gradients on males and females over 500 generations and across a range of the number of sex-specific loci (nSSML) in (a) a no selection regime, (b) a negative frequency-dependent selection regime in which initial tactic frequencies were equal ( $F_a=F_b$ ), and (c) a directional selection regime in which beta males were 1.8 x more likely to survive and mate than alpha males. Differences in sex-specific selection gradients were maintained in (b) the negative frequency-dependent and (c) directional selection regimes in which intersexual heritability is high (zero sex-specific loci), constraining the evolution of sexual dimorphism and maintaining the gender load.

260

261 Selection regimes and intersexual heritabilities affected geometric mean population growth  
262 rates ( $F_{7,377} = 23.91, p \ll 0.0001$ ). In most models, population size increased from 1000 in the  
263 parent generation to an asymptote of approximately 2000 individuals (Figure 4). However, in all  
264 the directional selection and negative frequency-dependent selection regimes, population size  
265 and geometric mean population growth rate were greatly reduced when there were zero sex-  
266 specific loci (i.e., when intersexual heritabilities were approximately 1). In no-selection regimes,  
267 geometric mean population growth rates did not differ across numbers of sex-specific loci (mean  
268  $\pm$  SD =  $0.0038 \pm 0.00038, F_{1,53} = 0.038, p > 0.8$ ). In negative frequency-dependent and  
269 directional selection regimes, geometric mean population growth rates differed across numbers  
270 of sex-specific loci (negative frequency-dependent selection:  $F_{1,163} = 111.19, p \ll 0.0001$ ;  
271 directional selection:  $F_{1,163} = 56.39, p \ll 0.0001$ ) such that they were lowest when the number of

## Sexual conflict maintains ARTs

272 sex-specific loci was zero. The degree to which population growth rate was reduced when there  
273 were no sex-specific loci (compared to other values of sex-specific loci) did not vary with  
274 different starting frequencies in the negative frequency-dependent selection models ( $F_{2,30} = 2.21$ ,  
275  $p = 0.13$ ). However, in directional selection regimes with zero sex-specific loci (i.e. models with  
276 intralocus sexual conflict), population growth rates decreased as the strength of directional  
277 selection against large (alpha) males increased ( $F_{2,30} = 45.65$ ,  $p \ll 0.0001$ ). These reductions in  
278 population size and geometric mean population growth rate were consistent with the unresolved  
279 gender load maintained when males and females were not able to evolve independently  
280 (Arnqvist and Tuda 2010). The maintenance of the gender load over time was evident in the sex-  
281 specific selection gradients for the directional selection simulations with no sex-specific loci  
282 (Figure 3).

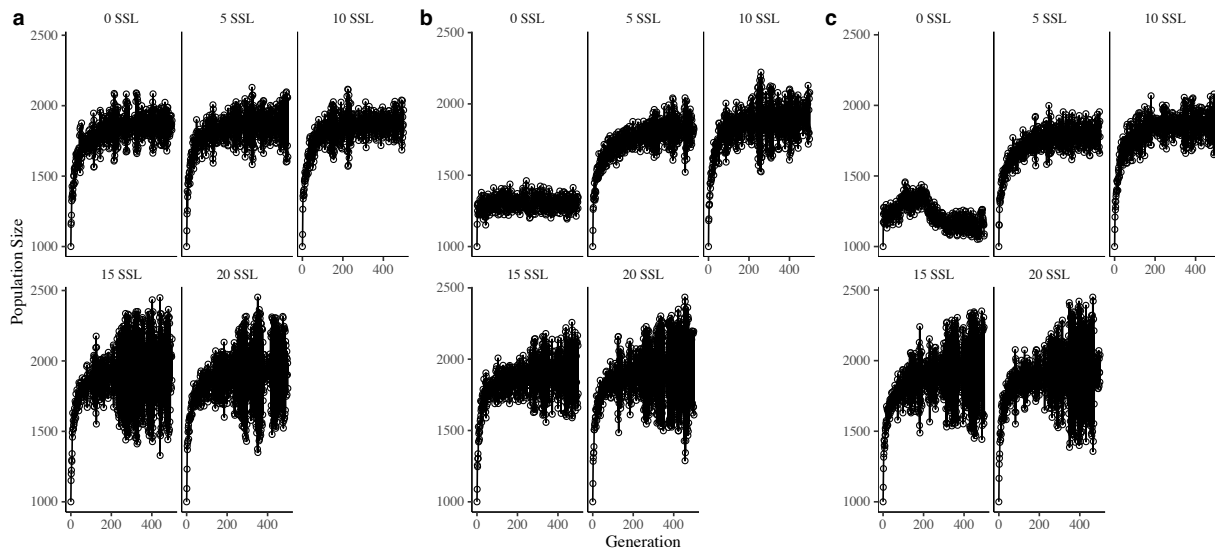

**Figure 4.** Population sizes over 500 generations and across a range of the number of sex-specific loci (nSSML) in (a) a no selection regime, (b) a negative frequency-dependent selection regime in which initial tactic frequencies were equal ( $F_a = F_b$ ), and (c) a directional selection regime in which beta males were 1.8 x more likely to survive and mate than alpha males. In (b) the negative frequency-dependent and (c) directional selection regimes in which intersexual heritability is high (zero sex-specific loci), population size is reduced because of the gender load.

283

284 Alternative reproductive tactics were maintained under three different conditions, comprising

285 19 of the 35 total scenarios we modeled. Of the 19 scenarios in which ARTs were maintained, 15



## Sexual conflict maintains ARTs

286 were under negative frequency-dependent selection, 2 were under the no selection regime, and 2  
287 were under the directional selection regime. First, under negative frequency-dependent selection  
288 (i.e., the probability of mating for tactic  $T$  is  $1-F_T$ ), both tactics were maintained regardless of  
289 initial tactic frequencies or the degree of intersexual heritability (Figure 5). This result was  
290 consistent across all 11 replicate model runs.

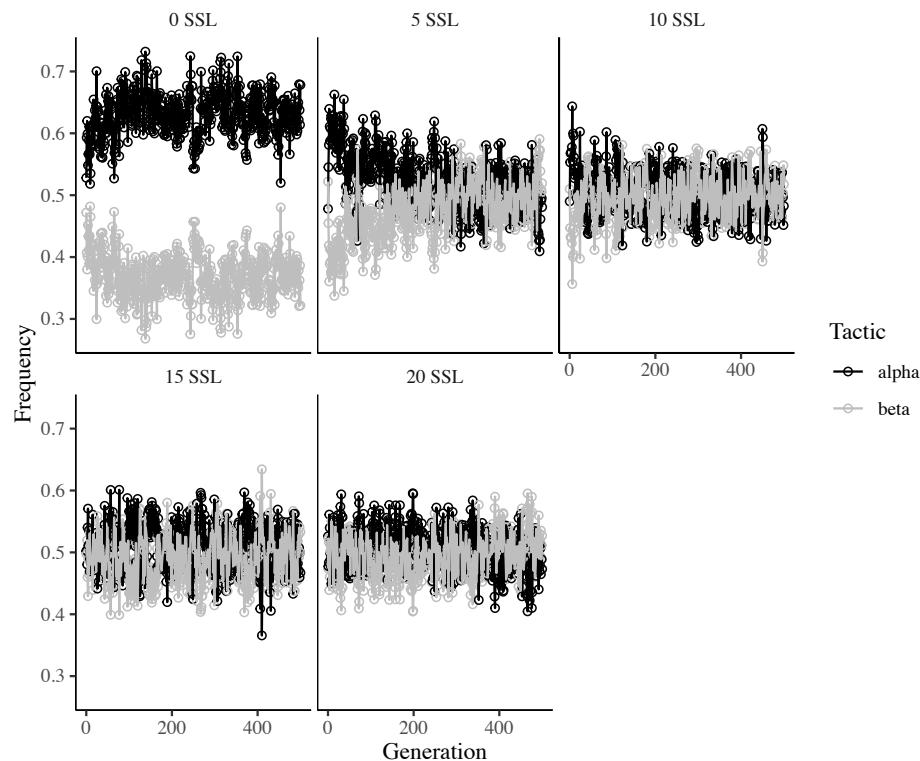

**Figure 5.** Frequency of alpha and beta males over 500 generations and across a range of the number of sex-specific loci (nSSML) in a “frequency-dependent selection” regime in which initial tactic frequencies were equal ( $F_a=F_b$ ). Tactic frequencies were not qualitatively different when initial tactic frequency ratios were 2:1 or 1:2 and are thus not shown here.

291

292 There are two general situations besides negative frequency-dependent selection, comprising  
293 4 modeled scenarios, in which ARTs were preserved across 500 generations in our model. First,  
294 ARTs were maintained in the no selection regime when intersexual heritability was low (e.g., 15  
295 or 20 sex-specific loci; Figure 6). Under no selection and 15 sex-specific loci, both tactics  
296 persisted over 500 generations in 9 of 11 model runs; under no selection and 20 sex-specific loci,

## Sexual conflict maintains ARTs

297 both tactics persisted over 500 generations in 10 of 11 model runs. In these same models, alpha  
298 males comprised >75% of the population by the 500<sup>th</sup> generation in 10 out of 11 “no selection”  
299 model runs with 15 sex-specific loci and 5 out of 11 “no selection” model runs with 20 sex-  
300 specific loci. Across all 11 “no selection” model run replicates, increasing the number of sex-  
301 specific loci resulted in a slower trend toward fixation of alpha males (Figure 6).

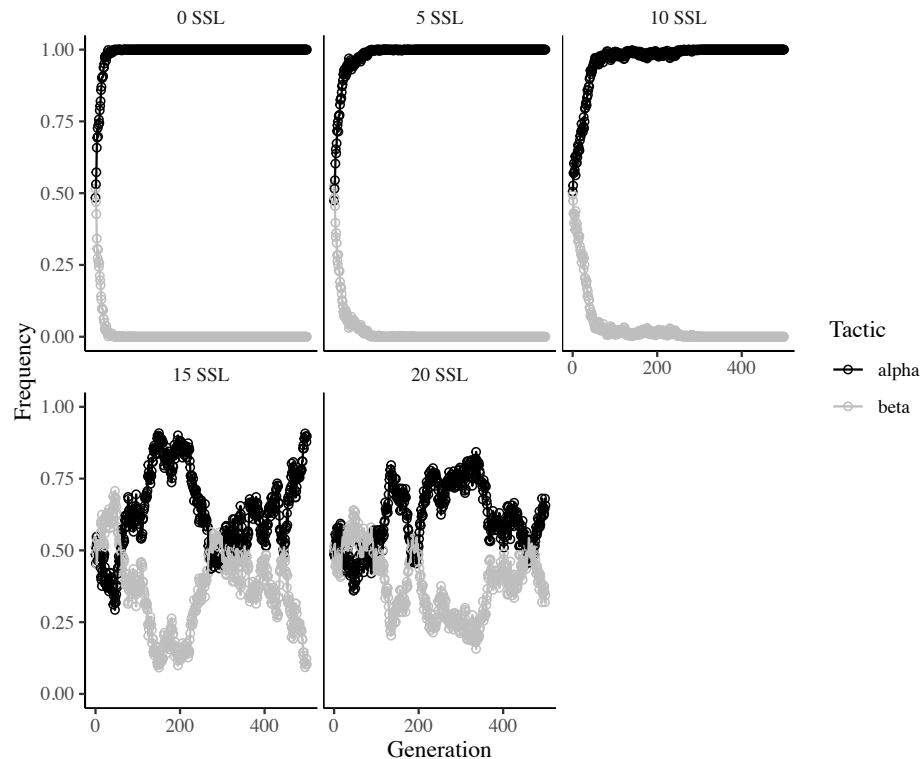

**Figure 6.** Frequency of alpha and beta males over 500 generations and across a range of the number of sex-specific loci (nSSML) in a “no selection” regime.

302

303 ARTs were also maintained by intralocus sexual conflict over body size. This occurred when  
304 selection on size was sexually antagonistic (favoring small males and large females) and  
305 intersexual heritability was high (e.g., zero sex-specific loci / all loci affect males and females  
306 equally; Figure 7). This was especially evident at intermediate strengths of directional selection  
307 (e.g., when beta males were 1.8 – 2 times more likely to survive and reproduce than alpha  
308 males), where direct selection on males was strong enough to reduce the frequency of alphas but

## Sexual conflict maintains ARTs

309 weak enough not to eliminate them entirely. In this situation ARTs were maintained because  
310 there was a balance between (a) correlated fecundity selection and high intersexual heritability  
311 producing larger sons and (b) selection against those large sons. This outcome was consistent  
312 across all 11 replicates of our model runs.

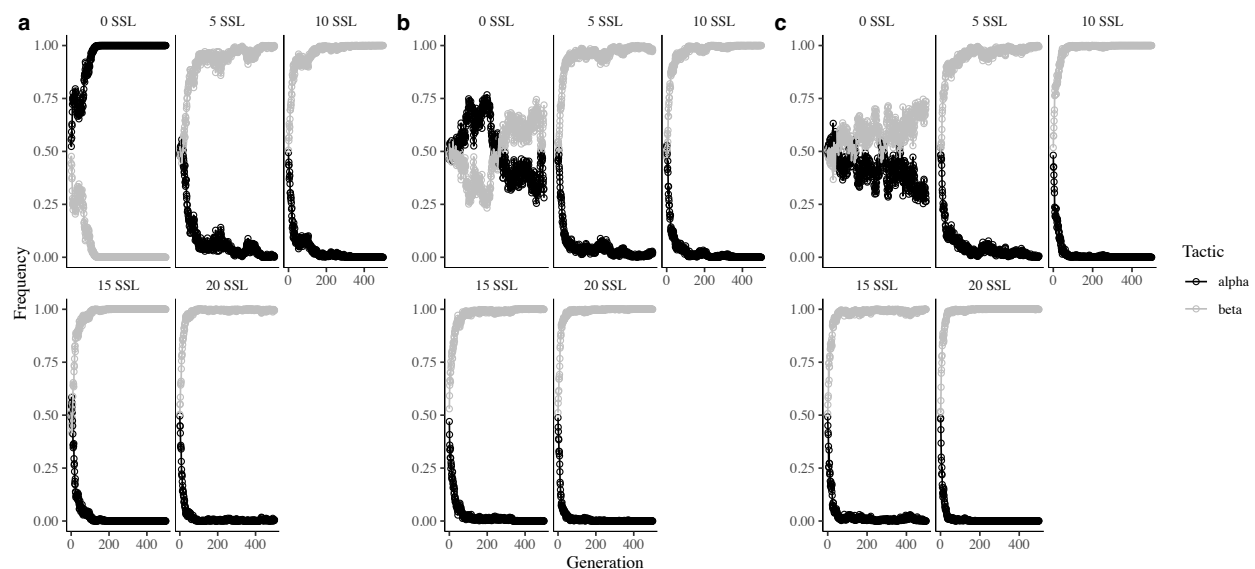

**Figure 7.** Frequency of alpha and beta males over 500 generations and across a range of the number of sex-specific loci in a “directional selection” regime in which the mating probability of beta males was (a) 1.5, (b) 1.8, and (c) 2 times that of alpha males.

313

314

## 315 Discussion

316 Alternative reproductive tactics abound in nature (Sinervo and Calsbeek 2010), yet few  
317 processes have been identified that sustain them. Those that have been identified – negative  
318 frequency-dependent selection and disruptive selection – both focus on selection acting directly  
319 on the sex exhibiting the polymorphism (Sinervo and Calsbeek 2006). We show that selection  
320 acting on both sexes, and intralocus sexual conflict that results when genetic architecture is  
321 shared, may also preserve sex-specific alternative reproductive tactics over hundreds of  
322 generations. If male ARTs differentially affect the fitness of their daughters, then they can be

## Sexual conflict maintains ARTs

323 maintained (or eliminated) by selection for (against) their daughters even in the absence of  
324 negative frequency-dependent fitness.

325 In addition to negative frequency-dependent selection, two other processes emerged from our  
326 model that preserved alternative tactics over 500 generations. First, both tactics persisted when  
327 there was no direct selection on males, and most (15) or all (20) loci were sex-specific in their  
328 expression. In this scenario there was also no correlated selection on males, because males could  
329 not pass on their size to their daughters. Fecundity selection favored large females, but these  
330 females could not pass on their large size to their sons because intersexual heritability was zero.  
331 Thus, there was neither direct nor correlated selection on male size, allowing the persistence of  
332 both tactics over 500 generations. The fact that alpha males comprised the majority of males by  
333 the 500<sup>th</sup> generation in most of these model runs suggests that these scenarios could not maintain  
334 ARTs indefinitely. However, because the trend toward an alpha male majority occurred more  
335 slowly in these models as the number of sex-specific loci increased, low intersexual heritability  
336 could play a role in preserving male ARTs in natural populations where selection on males is  
337 chronically weak or temporally and spatially variable.

338 The second scenario in which both ARTs were maintained over 500 generations was when  
339 beta males were 1.8 – 2 times more likely to survive and mate than alpha males, and the number  
340 of sex-specific loci was zero. This created a scenario in which males experienced direct selection  
341 favoring beta males and correlated selection favoring alpha males. Because no loci were sex-  
342 specific in their expression, size was heritable between the sexes, creating intralocus sexual  
343 conflict. When the strength of directional selection on male size was low (i.e., the fitness of betas  
344 was just 1.5 times higher than that of alphas), correlated selection outweighed direct selection  
345 and alpha males went to fixation. However, as the strength of directional selection increased,

## Sexual conflict maintains ARTs

346 direct and correlated selection balanced each other out, and both tactics persisted over 500  
347 generations.

348 Persistent intralocus sexual conflict in these scenarios was evident in the maintenance of the  
349 gender load. Selection gradients on females remained positive and those on males remained  
350 negative throughout these simulations due to intralocus sexual conflict constraining the evolution  
351 of sexual dimorphism. In concordance with theory, the maintenance of the gender load in these  
352 simulations resulted in a lower population growth rate compared with simulations in which the  
353 sexes could respond independently to selection. This finding shows that the maintenance of  
354 ARTs, when achieved through intralocus conflict, may reduce population fitness.

355 Our model also showed that one male tactic could go to fixation even when males did not  
356 experience direct selection. When females were selected to be larger, but male body size did not  
357 experience direct selection, alpha males became fixed in the population when intersexual  
358 heritability for body size was high. This occurred through correlated fecundity selection. This  
359 finding, though not explicitly predicted, again highlights the importance of understanding  
360 selection in both sexes when attempting to understand the evolutionary maintenance of sex-  
361 specific polymorphisms.

362 Our models consistently revealed that sexual conflict resulted in the persistence of a sex-  
363 specific polymorphism over hundreds of generations, even in the absence of negative frequency-  
364 dependent or disruptive selection. This result is consistent with a growing literature documenting  
365 genetic correlations between male ARTs and female fitness, suggesting that the maintenance of  
366 sex-specific ARTs through intralocus sexual conflict may be common and widespread in nature.  
367 For example, side-blotched lizards (*Uta stansburiana*) exhibit three male morphs associated with  
368 orange, blue, and yellow throat colors (Sinervo and Lively 1996). In this system the intersexual

## Sexual conflict maintains ARTs

369 heritability of throat color is high, and female throat color is correlated with fecundity, such that  
370 the genes associated with male ART have direct consequences for female fitness and population  
371 growth rate (Sinervo and Zamudio 2001). Though negative frequency-dependent selection seems  
372 partly responsible for ART maintenance in this system, genetic correlations between male tactic  
373 and female fitness also have the potential to affect ART frequencies (Sinervo and Zamudio  
374 2001).

375 Male Pacific field crickets (*Teleogryllus oceanicus*) in Hawaii exhibit singing and silent  
376 reproductive tactics that stem from different wing morphologies (normal and flatwing; Zuk et al.  
377 2006). These wing morphologies can be inherited and expressed by daughters, and flatwing  
378 females invest less in reproductive tissue mass, experience more frequent mating failure, and are  
379 less likely to mount and mate with males compared to normal females (Heinen Kay et al. 2019;  
380 Heinen-Kay et al. 2020b; Richardson et al. 2021). Because flatwing males have much higher  
381 survival (Zuk et al. 2006) and sire more offspring than normal males (Heinen-Kay et al. 2019),  
382 while flatwing females seem to have lower fitness, intralocus sexual conflict over wing  
383 morphology is likely driving the maintenance of both male ARTs (Heinen-Kay et al. 2020b).

384 Studies of the bulb mite (*Rhizoglyphus* spp.) are also consistent with ART maintenance  
385 through intralocus sexual conflict. In artificial selection experiments, females from lines selected  
386 for fighter males have lower fitness (fecundity and longevity) than females from lines selected  
387 for sneakers (Bielak et al. 2014; Łukasiewicz et al. 2020). Harano et al. (2010) showed the same  
388 pattern in flour beetles (*Gnatocerus cornutus*) using an artificial selection experiment in which  
389 they selected for larger or smaller male mandibles. While flour beetles do not have ARTs *per se*,  
390 they do exhibit sexual dimorphism in a sexually selected weapon, and the intralocus sexual

## Sexual conflict maintains ARTs

391 conflict arising from simultaneous sexually antagonistic selection and an intersexual genetic  
392 correlation for mandible size could maintain variation in males as shown in the present paper.

393 While the concepts of intralocus sexual conflict and correlated selection are decades old  
394 (Lande and Arnold 1983; Rice and Chippindale 2001), they have only just begun to penetrate the  
395 literature on alternative reproductive tactics. Our results show that intralocus sexual conflict can  
396 play a role in the maintenance of ARTs, and that understanding the maintenance - or elimination  
397 - of sex-specific polymorphisms requires considering selection in both sexes. Fruitful systems in  
398 which to look for this phenomenon in nature will include those in which the trait or traits that  
399 differentiate ARTs are also expressed in females (e.g., body size), or those in which genetic  
400 correlations between ARTs and female survival or reproductive success have already been  
401 established.

402

403 **Data Availability Statement:** The individual-based model used in this paper will be uploaded to  
404 Dryad upon acceptance.

405

406 **Acknowledgements:** We thank Mark McPeck, Suzanne Alonzo, and Michael Whitlock for  
407 helpful discussions and suggestions on the model and the biological systems it describes. MMG  
408 is grateful to David Noakes for inspiration in addressing this question with a model. RC was  
409 funded by an award from the National Science Foundation ((NSF) DEB-1655092).

410

411 **Author Contributions:** MMG conceived the study; MMG built the model and drafted the  
412 manuscript; both authors contributed to critically revising and approving the final manuscript.

413

414

## Sexual conflict maintains ARTs

### 415 **References:**

- 416 Arnqvist, G., and M. Tuda. 2010. Sexual conflict and the gender load: correlated evolution  
417 between population fitness and sexual dimorphism in seed beetles. *Proceedings of the*  
418 *Royal Society B* 277:1345–1352.
- 419 Bielak, A. P., A. M. Skrzynecka, K. Miler, and J. Radwan. 2014. Selection for alternative male  
420 reproductive tactics alters intralocus sexual conflict. *Evolution* 68:2137–2144.
- 421 Bonduriansky, R. 2011. Sexual Selection and Conflict as Engines of Ecological Diversification.  
422 *The American Naturalist* 178:729–745.
- 423 Bonduriansky, R., and S. F. Chenoweth. 2009. Intralocus sexual conflict. *Trends in Ecology &*  
424 *Evolution* 24:280–288.
- 425 Buzatto, B. A., and H. L. Clark. 2020. Selection for Male Weapons Boosts Female Fecundity,  
426 Eliminating Sexual Conflict in the Bulb Mite. *Scientific Reports* 10:2311.
- 427 Buzatto, B. A., H. L. Clark, and J. L. Tomkins. 2018. Morph-specific artificial selection reveals a  
428 constraint on the evolution of polyphenisms. *Proceedings of the Royal Society B*  
429 285:20180335.
- 430 Connallon, T., and A. G. Clark. 2012. A general population genetic framework for antagonistic  
431 selection that accounts for demography and recurrent mutation. *Genetics* 190:1477–1489.
- 432 Connallon, T., and A. G. Clark. 2014. Balancing Selection in Species with Separate Sexes:  
433 Insights from Fisher’s Geometric Model. *Genetics* 197:991–1003.
- 434 Cordero, A. 1990. The inheritance of female polymorphism in the damselfly *Ischnura graellsii*  
435 (Rambur) (Odonata: Coenagrionidae). *Heredity* 64:341–346.
- 436 Cox, R. M., and R. Calsbeek. 2009. Sexually antagonistic selection, sexual dimorphism, and the  
437 resolution of intralocus sexual conflict. *The American Naturalist* 173:176–187.



## Sexual conflict maintains ARTs

- 438 Emlen, D. J. 1994. Environmental Control of Horn Length Dimorphism in the Beetle  
439 *Onthophagus acuminatus* (Coleoptera: Scarabaeidae). *Proceedings of the Royal Society B*  
440 256:131–136. The Royal Society.
- 441 Falconer, D. S., and T. F. C. Mackay. 1960. *Introduction to Quantitative Genetics*.
- 442 Foerster, K., T. Coulson, B. C. Sheldon, J. M. Pemberton, T. H. Clutton-Brock, and L. E. B.  
443 Kruuk. 2007. Sexually antagonistic genetic variation for fitness in red deer. *Nature*  
444 447:1107–1110.
- 445 Gross, M. R. 1996. Alternative reproductive strategies and tactics: diversity within sexes. *Trends*  
446 *in Ecology and Evolution* 11:92–98.
- 447 Gross, M. R. 1985. Disruptive selection for alternative life histories in salmon. *Nature* 313:47–  
448 48.
- 449 Gross, M. R. 1991. Evolution of alternative reproductive strategies: frequency-dependent sexual  
450 selection in male bluegill sunfish. Pp. 55–75 *in* R. Wootton and G. Potts, eds. *Fish*  
451 *reproduction: strategies and tactics*. ... Transactions of the Royal Society of ..., London.
- 452 Gross, M. R., and J. Repka. 1998. Stability with inheritance in the conditional strategy. *Journal*  
453 *of Theoretical Biology* 192:445–453.
- 454 Harano, T., K. Okada, S. Nakayama, T. Miyatake, and D. J. Hosken. 2010. Intralocus Sexual  
455 Conflict Unresolved by Sex-Limited Trait Expression. *Current Biology* 20:2036–2039.
- 456 Heinen Kay, J. L., D. B. Strub, S. L. Balenger, and M. Zuk. 2019. Direct and indirect effects of  
457 sexual signal loss on female reproduction in the Pacific field cricket (*Teleogryllus*  
458 *oceanicus*). *Journal of Evolutionary Biology* jeb.13534-31.
- 459 Heinen-Kay, J. L., R. E. Nichols, and M. Zuk. 2020a. Sexual signal loss, pleiotropy, and  
460 maintenance of a male reproductive polymorphism in crickets. *Evolution* 74:1002–1009.

## Sexual conflict maintains ARTs

- 461 Heinen-Kay, J. L., R. E. Nichols, and M. Zuk. 2020b. Sexual signal loss, pleiotropy, and  
462 maintenance of a male reproductive polymorphism in crickets. *Evolution* 74:1002–1009.
- 463 Heinen-Kay, J. L., E. M. Urquhart, and M. Zuk. 2019. Obligately silent males sire more  
464 offspring than singers in a rapidly evolving cricket population. *Biology Letters*  
465 15:20190198.
- 466 Hughes, K. A., A. E. Houde, A. C. Price, and F. H. Rodd. 2013. Mating advantage for rare males  
467 in wild guppy populations. *Nature* 503:108–110.
- 468 Hunt, J., and L. W. Simmons. 1997. Patterns of fluctuating asymmetry in beetle horns: an  
469 experimental examination of the honest signalling hypothesis. *Behavioral Ecology and*  
470 *Sociobiology* 41:109–114.
- 471 Lande, R. 1980. Sexual dimorphism, sexual selection, and adaptation in polygenic characters.  
472 *Evolution* 34:292.
- 473 Lande, R., and S. J. Arnold. 1983. The measurement of selection on correlated characters.  
474 *Evolution* 37:1210.
- 475 Lank, D. B., C. M. Smith, O. Hanotte, T. Burke, and F. Cooke. 1995. Genetic polymorphism for  
476 alternative mating behavior in lekking male ruff *Philomachus pugnax*. *Nature* 378:59–62.
- 477 Lewontin, R. C., and D. Cohen. 1969. On population growth in a randomly varying environment.  
478 *Proc Natl Acad Sci U S A* 62:1056–1060.
- 479 Łukasiewicz, A., M. Niškiewicz, and J. Radwan. 2020. Sexually selected male weapon is  
480 associated with lower inbreeding load but higher sex load in the bulb mite. *Evolution*  
481 74:1851–1855.

## Sexual conflict maintains ARTs

- 482 Moczek and Emlen. 1999. Proximate determination of male horn dimorphism in the beetle  
483 *Onthophagus taurus* (Coleoptera: Scarabaeidae). *Journal of Evolutionary Biology* 12:27–  
484 37.
- 485 Neff, B. D., and E. I. Svensson. 2013. Polyandry and alternative mating tactics. *Philosophical*  
486 *Transactions of the Royal Society B: Biological Sciences* 368:20120045–20120045.
- 487 Oliviera, R. F., M. Taborsky, and H. J. Brockmann. 2008. Integrating mechanisms and function:  
488 prospects for future research. Cambridge University Press, Cambridge.
- 489 Otto, S. P., and T. Day. 2007. *A Biologist's Guide to Mathematical Modeling in Ecology and*  
490 *Evolution*. Princeton University Press.
- 491 Rice, W. R., and A. K. Chippindale. 2001. Intersexual ontogenetic conflict. *Journal of*  
492 *Evolutionary Biology* 14:685–693.
- 493 Richardson, J., J. L. Heinen-Kay, and M. Zuk. 2021. Sex-specific associations between life-  
494 history traits and a novel reproductive polymorphism in the Pacific field cricket. *Journal*  
495 *of Evolutionary Biology* 0:1–9.
- 496 Shuster, S. M. 1989. Male Alternative Reproductive Strategies in a Marine Isopod Crustacean  
497 (*Paracerceis sculpta*): The Use of Genetic Markers to Measure Differences in  
498 Fertilization Success Among  $\alpha$ -,  $\beta$ -, and  $\gamma$ -Males. *Evolution* 43:1683–1698. [Society for  
499 the Study of Evolution, Wiley].
- 500 Shuster, S. M., and M. J. Wade. 2003. *Mating systems and strategies*. Princeton University Press,  
501 Princeton, NJ.
- 502 Sinervo, B., and R. Calsbeek. 2010. Behavioral concepts of selection: experiments and causes of  
503 selection on the sexes. P. *in* *Evolutionary Behavior Ecology*. Oxford University Press.

## Sexual conflict maintains ARTs

- 504 Sinervo, B., and R. Calsbeek. 2006. The Developmental, Physiological, Neural, and Genetical  
505 Causes and Consequences of Frequency-Dependent Selection in the Wild. *Annual*  
506 *Review of Ecology, Evolution, and Systematics* 37:581–610.
- 507 Sinervo, B., and C. M. Lively. 1996. The rock–paper–scissors game and the evolution of  
508 alternative male strategies. *Nature* 380:240–243.
- 509 Sinervo, B., D. B. Miles, W. A. Frankino, M. Klukowski, and D. F. DeNardo. 2000a.  
510 Testosterone, Endurance, and Darwinian Fitness: Natural and Sexual Selection on the  
511 Physiological Bases of Alternative Male Behaviors in Side-Blotched Lizards. *Hormones*  
512 *and Behavior* 38:222–233.
- 513 Sinervo, B., E. Svensson, and T. Comendant. 2000b. Density cycles and an offspring quantity  
514 and quality game driven by natural selection. *Nature* 406:985–988.
- 515 Sinervo, B., and K. R. Zamudio. 2001. The evolution of alternative reproductive strategies:  
516 fitness differential, heritability, and genetic correlation between the sexes. *The Journal of*  
517 *Heredity* 92:198–205.
- 518 Thornhill, R. 1981. *Panorpa* (Mecoptera: Panorpidae) Scorpionflies: Systems for Understanding  
519 Resource-Defense Polygyny and Alternative Male Reproductive Efforts. *Annual Review*  
520 *of Ecology and Systematics* 12:355–386.
- 521 Zuk, M., J. T. Rotenberry, and R. M. Tinghitella. 2006. Silent night: adaptive disappearance of a  
522 sexual signal in a parasitized population of field crickets. *Biology Letters* 2:521–524.
- 523
